# Supplementary material for: Green coating by coordination of tannic acid and iron ions for antioxidant nanofiltration membranes
Source: Royal Society of Chemistry journal article supplement (doi:10.1039/c5ra23490e), 2015-01-01
Supplement: c5ra23490e1.pdf [file c5ra23490e1.pdf]

## Supporting information

### **Green coating by coordination of tannic acid and iron ions for antioxidant nanofiltration membranes**

Lin Fan <sup>a, b</sup>, Yanyan Ma <sup>a, b</sup>, Yanlei Su <sup>a, b\*</sup>, Runnan Zhang <sup>a, b</sup>, Yanan Liu <sup>a, b</sup>, Qi Zhang <sup>a, b</sup>, Zhongyi Jiang <sup>a,</sup>

<sup>b</sup>

<sup>a</sup> *Key Laboratory for Green Chemical Technology, School of Chemical Engineering and Technology,  
Tianjin University, Tianjin 300072, China*

<sup>b</sup> *Collaborative Innovation Center of Chemical Science and Engineering (Tianjin), Tianjin University,  
Tianjin 300072, China*

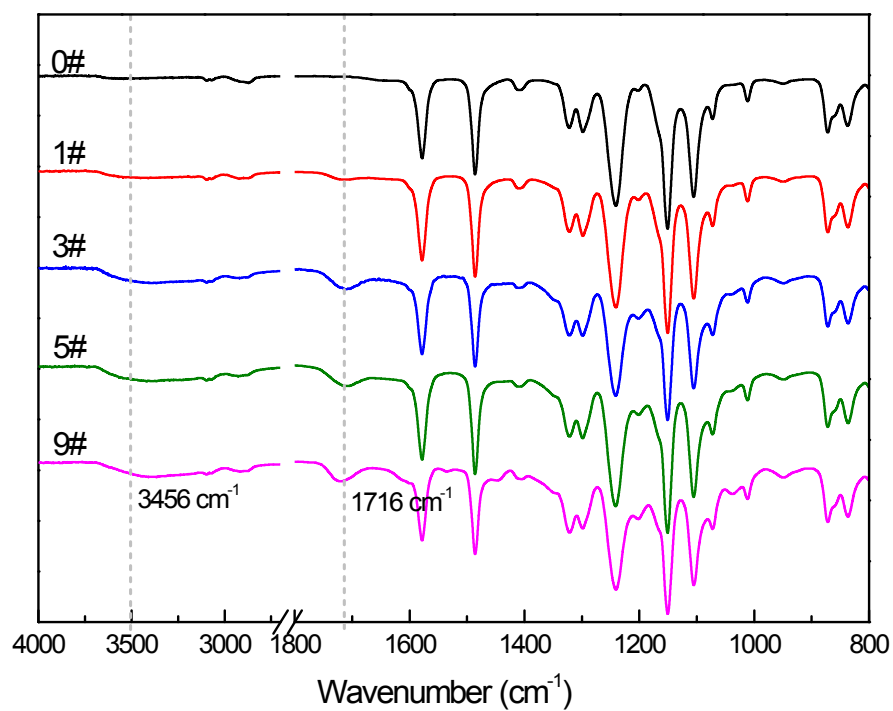

Fig. S1 ATR-FTIR spectra of PES substrate (0# membrane) and TA-Fe<sup>III</sup>/PES composite NF membranes (1, 3, 5 and 9# membranes).

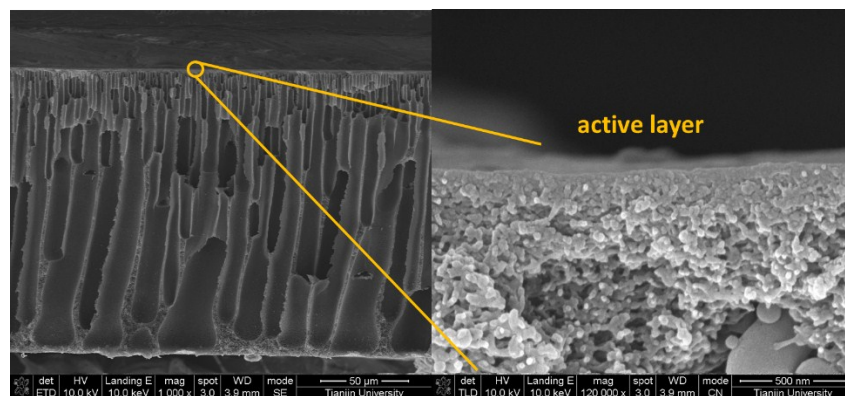

(a)

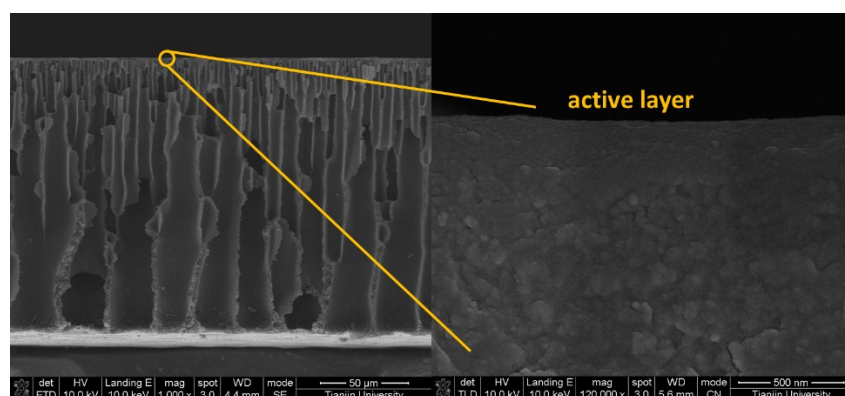

(b)

Fig. S2 SEM images of the cross section of the virgin PES membrane (a) and TA-Fe<sup>III</sup>/PES composite NF membrane (b, 3#).

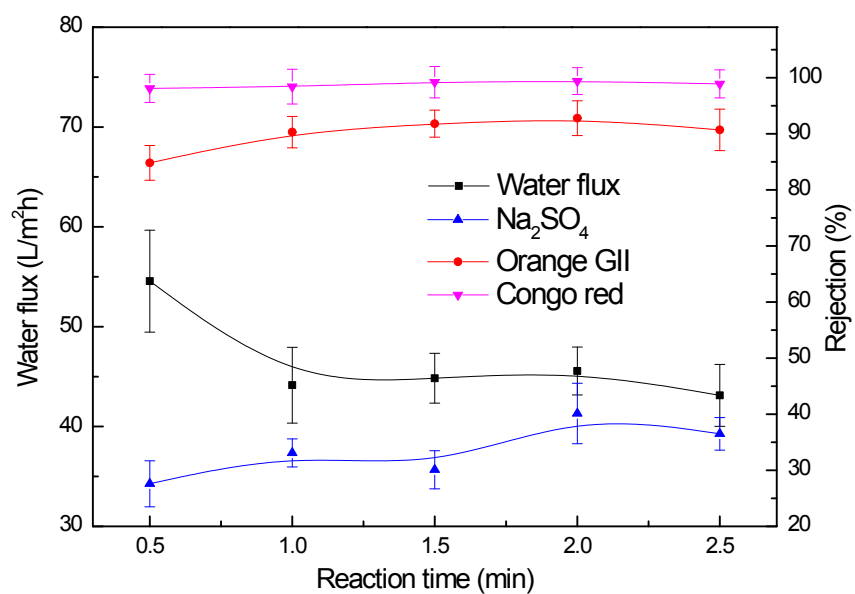

Fig. S3 The influence of reaction time on water flux and rejection of the nanofiltration membranes, the concentrations of TA and FeCl<sub>3</sub> were fixed at 1.5 and 1.0 g/L in solutions, respectively. The filtration operation was carried out at an operation pressure of 0.20 MPa.

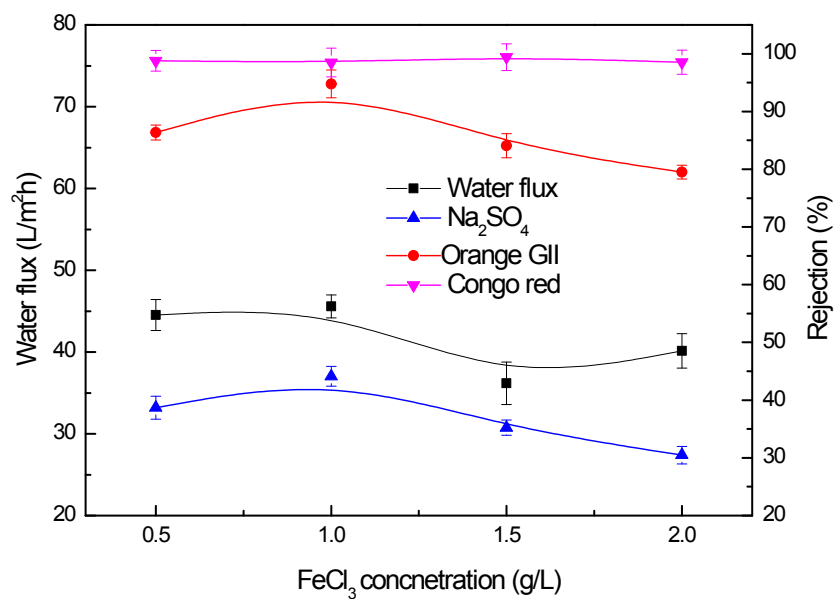

Fig. S4 The influence of FeCl<sub>3</sub> concentrations on water flux and rejection of the nanofiltration membranes, the concentration of TA was fixed at 1.5g/L and reaction time was fixed at 1 min. The filtration operation was carried out at an operation pressure of 0.20 MPa.

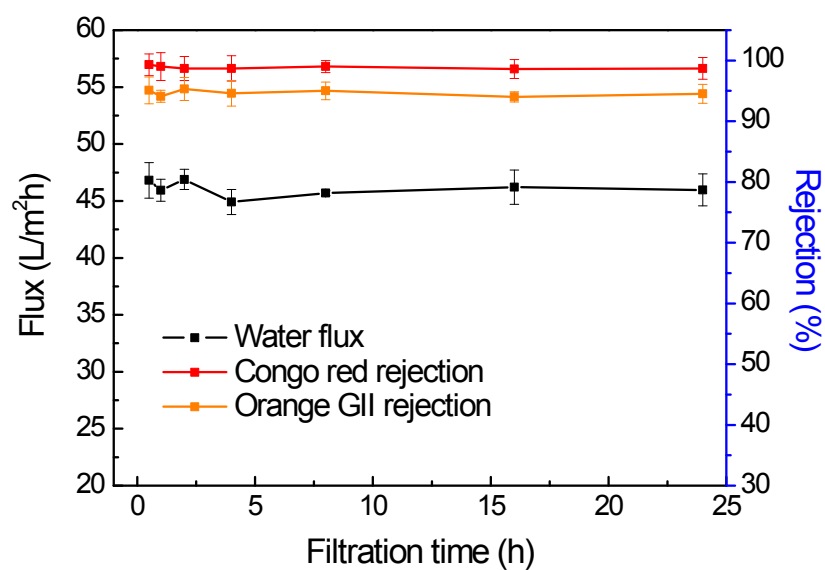

Fig. S5 The influence of filtration time on the water flux and dye rejection of the prepared TA-Fe<sup>III</sup>/PES composite NF membrane (3#). The filtration operation was carried out at an operation pressure of 0.20 MPa.

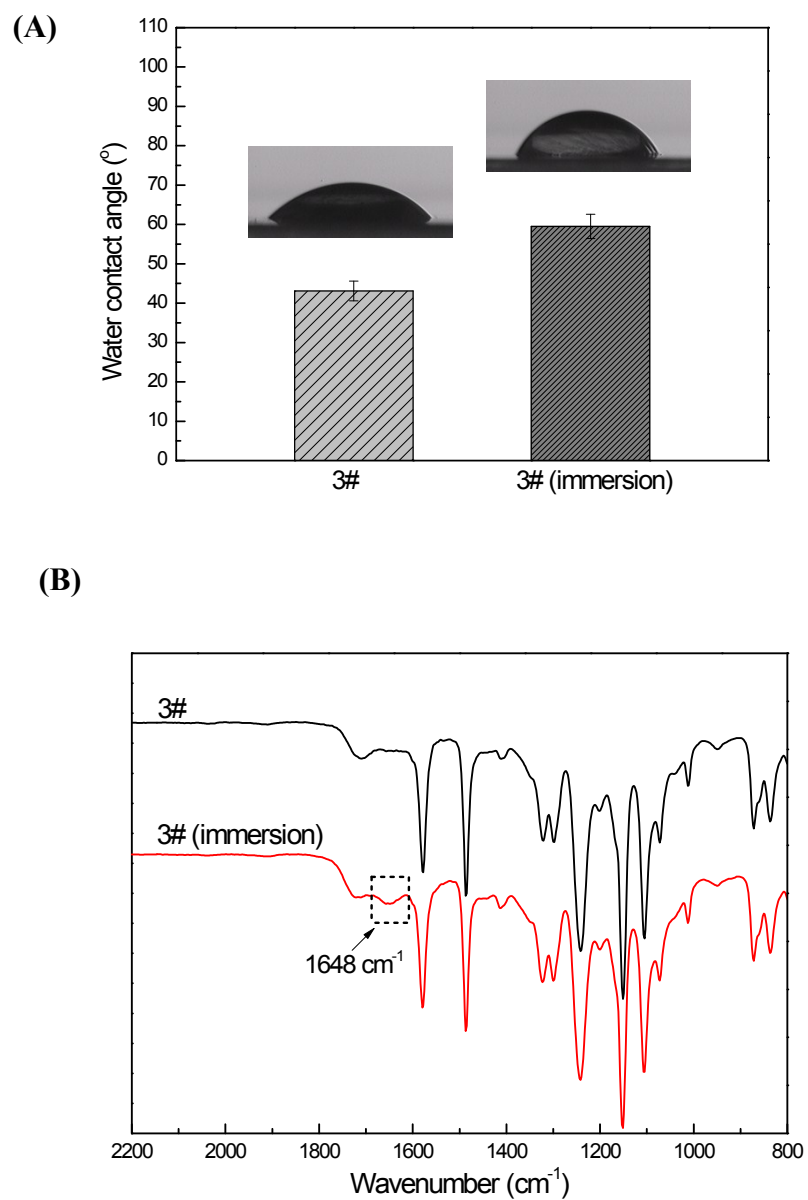

Fig. S6 The water contact angles (A) and FTIR spectra (B) for the TA-Fe<sup>III</sup>/PES composite NF membrane (3#) before and after immersion into 100 ppm sodium hypochlorite solution of 12 days.
